# Supplementary material for: Ultrafast water sensing and thermal imaging by a metal-organic framework with switchable luminescence
Source: PubMed Central journal article supplement (PMC5497063; doi:10.1038/ncomms15985), 2017-06-30
Supplement: ncomms15985-s1.pdf [file ncomms15985-s1.pdf]

File Name: Supplementary Information

Description: Supplementary Figures, Supplementary Tables, Supplementary Methods and Supplementary References

File Name: Supplementary Movie 1

Description: Emission colour change by N<sub>2</sub> blow on paper-based film of LIFM-CL1-H<sub>2</sub>O (under 365 UV, direction 1).

File Name: Supplementary Movie 2

Description: Emission colour change by N<sub>2</sub> blow on paper-based film of LIFM-CL1-H<sub>2</sub>O (under 365 UV, direction 2).

File Name: Supplementary Movie 3

Description: Emission colour change by N<sub>2</sub> blow on ZnO-supported film of LIFM-CL1-H<sub>2</sub>O (under 365 UV).

File Name: Peer Review File

Description:

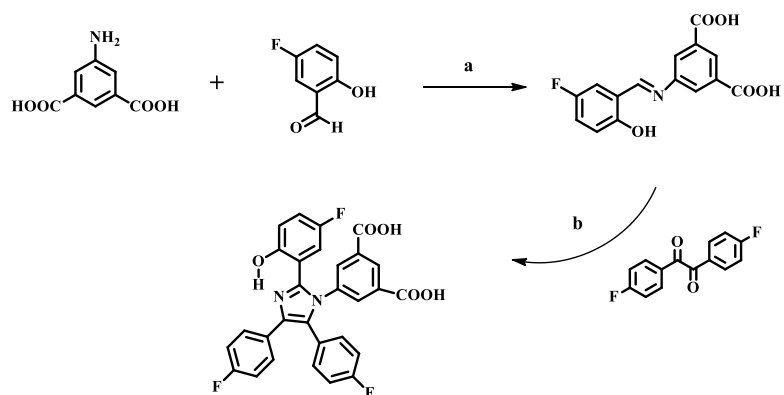

**Supplementary Figure 1** | Synthetic route of ligand H<sub>2</sub>hpi2cf. Reagents and conditions: **(a)** acetic acid, N<sub>2</sub> atmosphere, 110 °C, 2 h, 80%; **(b)** acetic acid, Diphenylethanedione, ammonium acetate, 110 °C, 10 h, 67%.

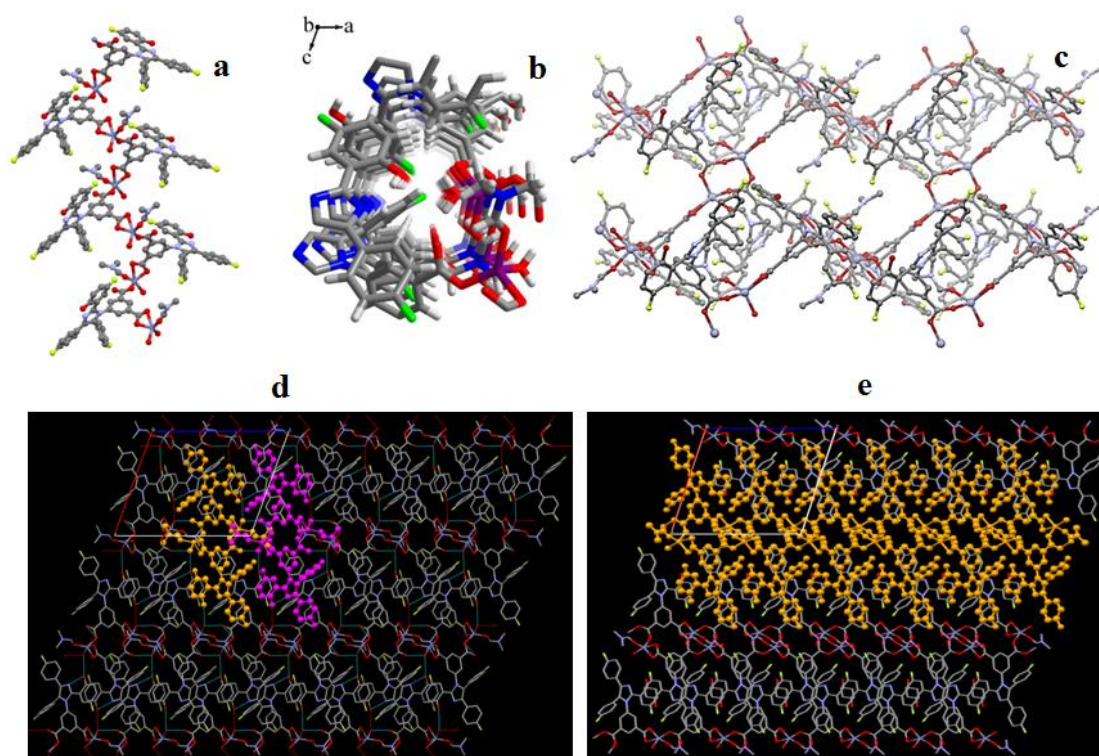

**Supplementary Figure 2** | (a) One-dimensional chains in LIFM-CL1-H<sub>2</sub>O crystal, (b) micropore along *b*-axis in LIFM-CL1-H<sub>2</sub>O crystal, (c) 2D layer formed in dehydrated LIFM-CL1 via structural transformation mediated by coordinating-water removal and carboxylate O-Zn bond formation, (d) side-by-side packing alignment of 1D chains in LIFM-CL1-H<sub>2</sub>O crystal lattice, forming H-bonds and  $\pi$ -stacking between chains, and (e) packing of 2D layers on *bc*-plane in LIFM-CL1 crystal.

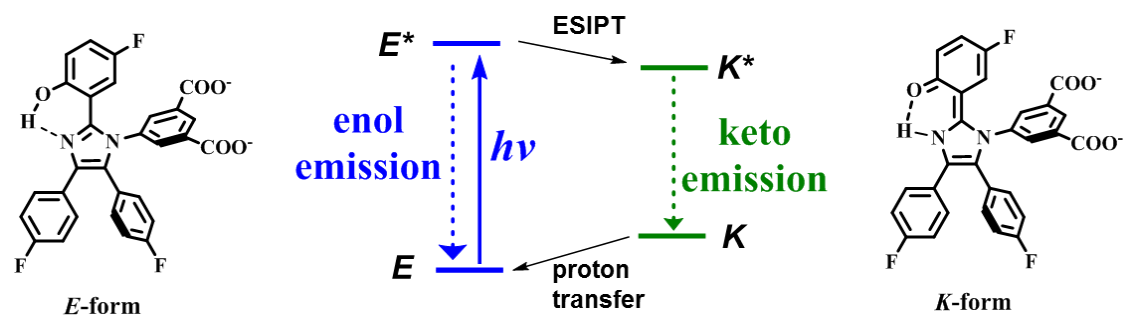

**Supplementary Figure 3** | Chemical structure of ligand H<sub>2</sub>hpi2cf in *E*-form and *K*-form, and emission levels relating to *E*-form and *K*-form of ligand based on ESIP process. The tautomerization between *E*-form and *K*-form upon excitation is blocked in LIFM-CL1-H<sub>2</sub>O by H-bonding but tuned-on in LIFM-CL1.

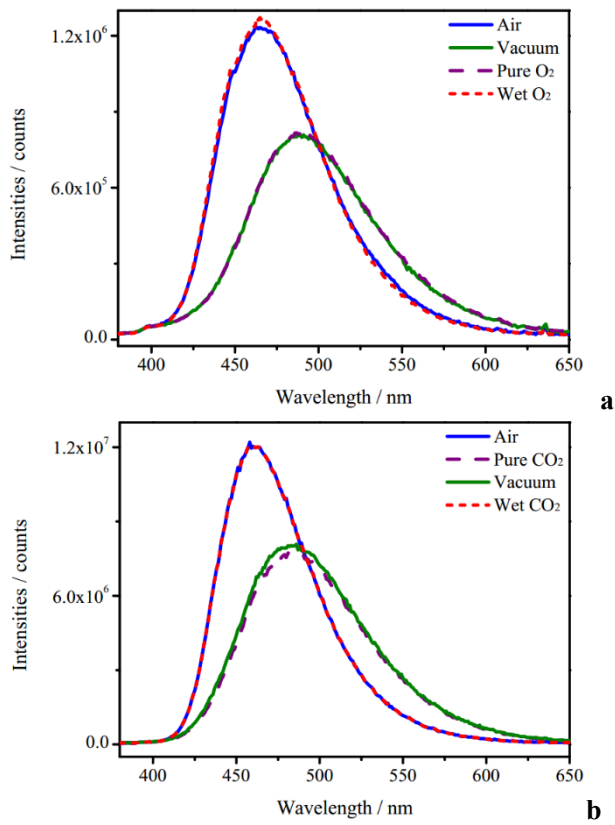

**Supplementary Figure 4** | The comparison of emission spectra of LIFM-CL1-H<sub>2</sub>O measured sequentially in air atmosphere (RH = 45% at 25 °C), vacuum, and *in-situ* gas flow of pure O<sub>2</sub> (**a**), CO<sub>2</sub> (**b**) and wet O<sub>2</sub> (**a**), CO<sub>2</sub> (**b**) containing water vapor that was collected from a bubbling tube filled with water.

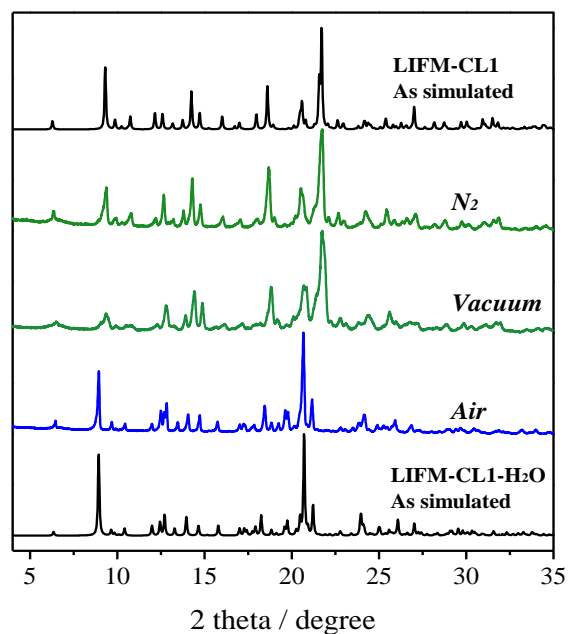

**a**

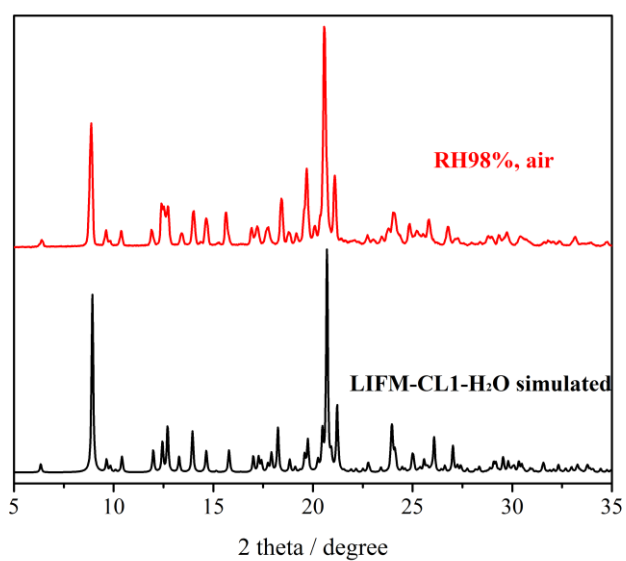

**b**

**Supplementary Figure 5 |** (a) The *in-situ* PXRD patterns of LIFM-CL1-H<sub>2</sub>O measured in turn in ambient air, vacuum, and N<sub>2</sub> atmosphere, compared with the respective simulated XRD patterns; (b) the PXRD pattern of LIFM-CL1-H<sub>2</sub>O measured in ambient air (RH 98%) compared with that of simulated pattern.

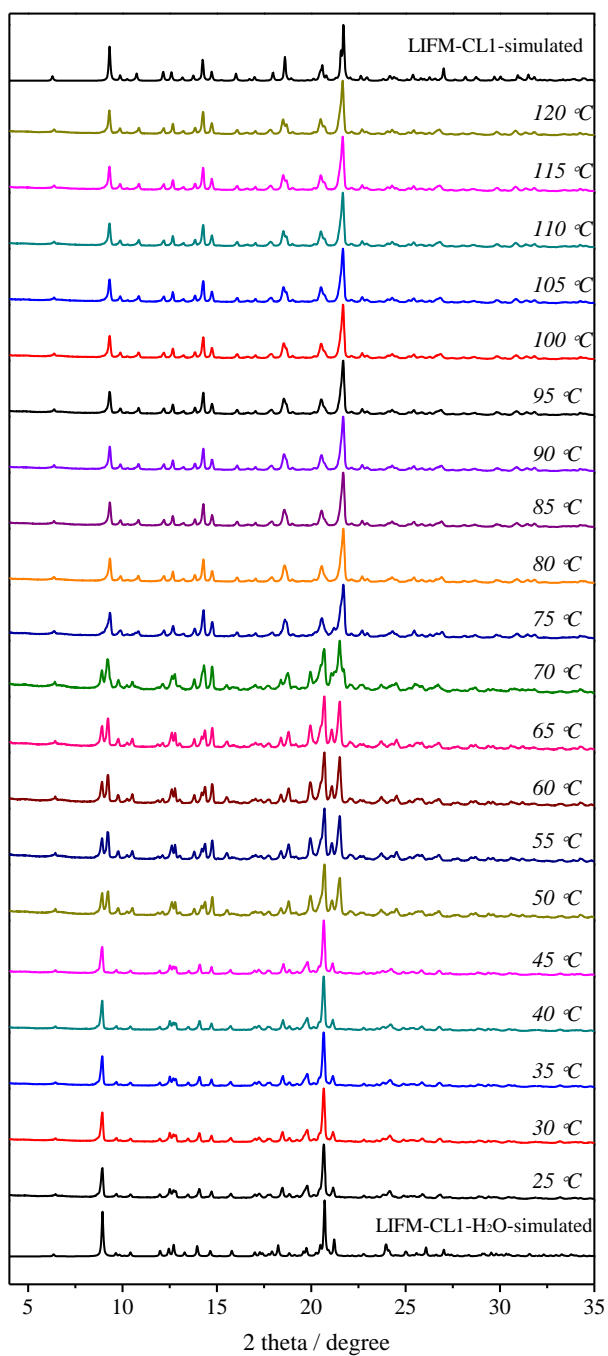

**Supplementary Figure 6** | *In-situ* variable temperature PXRD patterns of Zn-MOF showing the transformation from LIFM-L1-H<sub>2</sub>O to LIFM-CL1. The measurement was performed in air with the temperature rising rate of 1 °C min<sup>-1</sup>, and each temperature was stabilized for 5 minutes before the corresponding powder diffraction test.

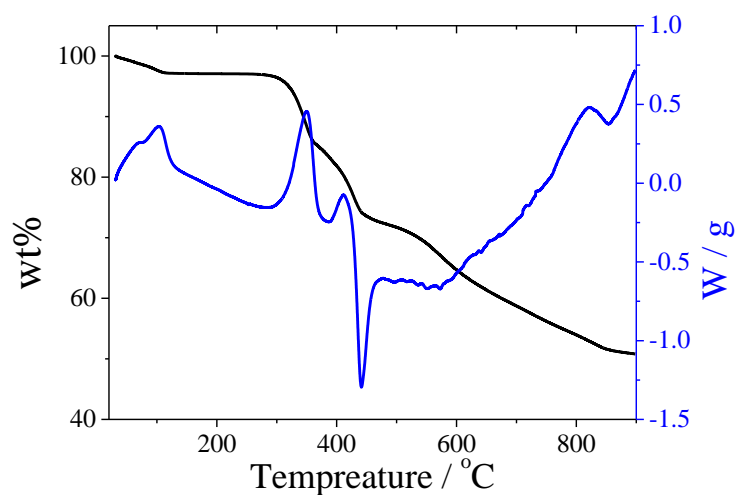

a

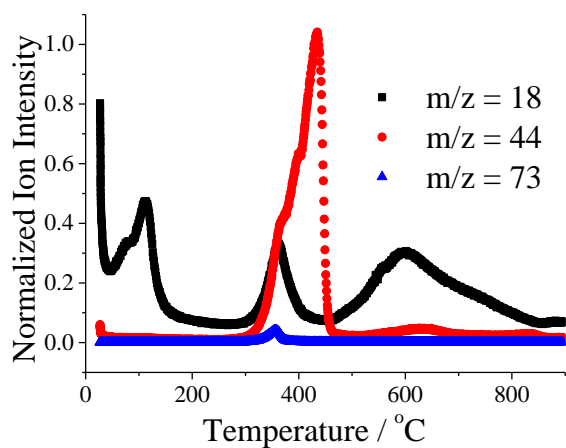

b

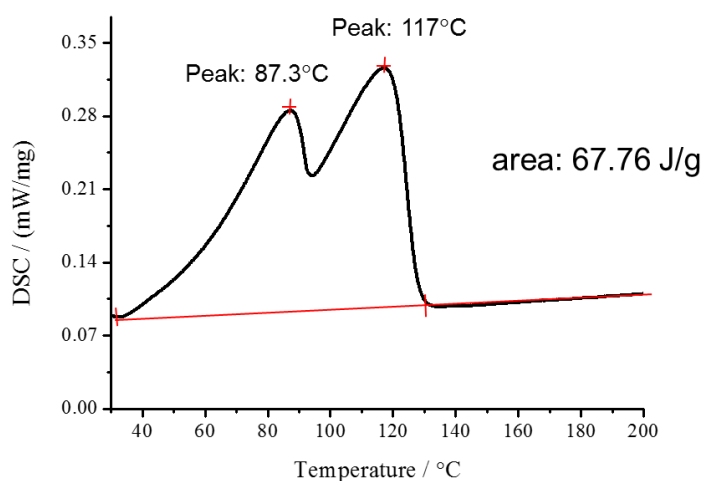

c

**Supplementary Figure 7** | TG, TG-MS and DSC of LIFM-CL1-H<sub>2</sub>O. (a) TG shows a weight losses between 50-112 °C, corresponding to removal of coordinating water molecules. (b) TG-MS shows escape of water, CO<sub>2</sub> and DMF molecules in different heating stage. (c) DSC shows enthalpic change during water escape.



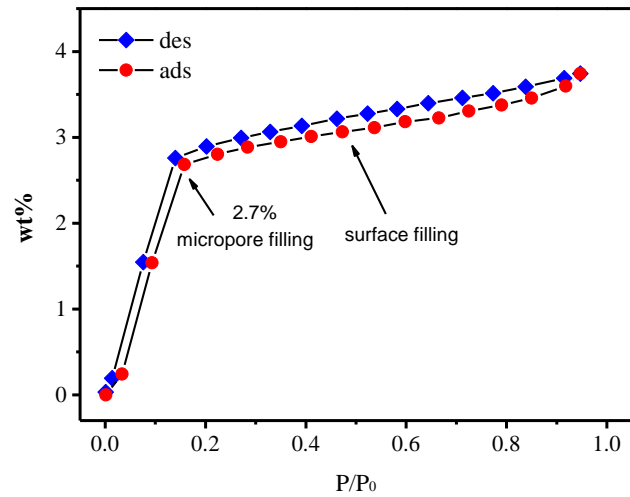

**a**

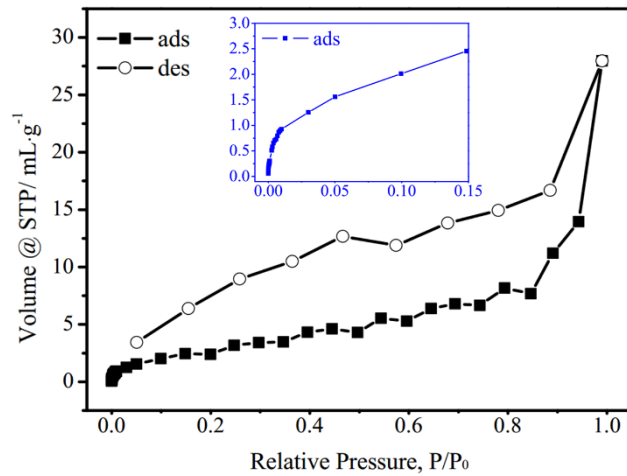

**b**

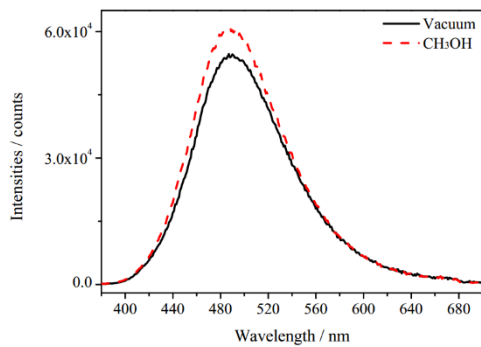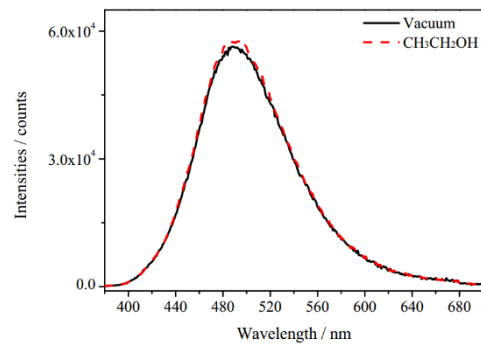

**c**

**Supplementary Figure 8** | Water (a) and nitrogen (b) adsorption and desorption isotherms at 298 and 77 K, respectively, for dehydrated sample LIFM-CL1, and the comparison of emission spectra (c) of dehydrated LIFM-CL1 sample measured in methanol and ethanol vapors. The dehydrated LIFM-CL1 was obtained by vacuumizing the hydrated LIFM-CL1-H<sub>2</sub>O sample, and the alcohol vapors were generated from a N<sub>2</sub> bubbling tube filled with dry methanol or ethanol solvents.

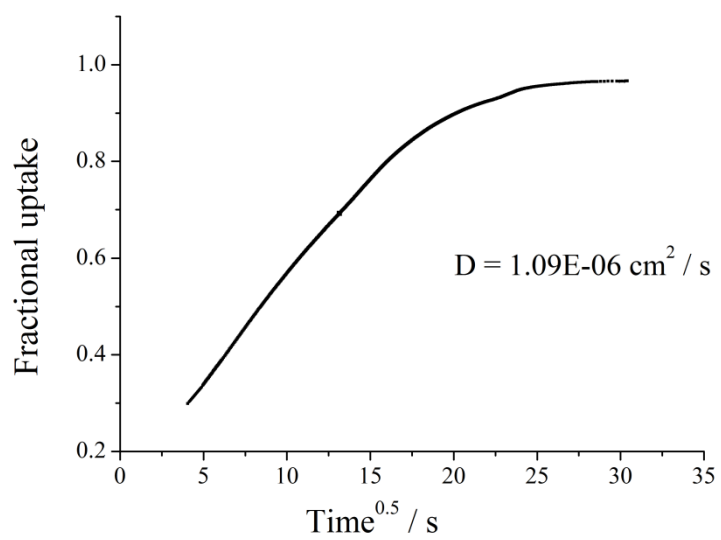

**Supplementary Figure 9** | Kinetic profile of water vapor adsorption of LIFM-CL1 at 298 K.

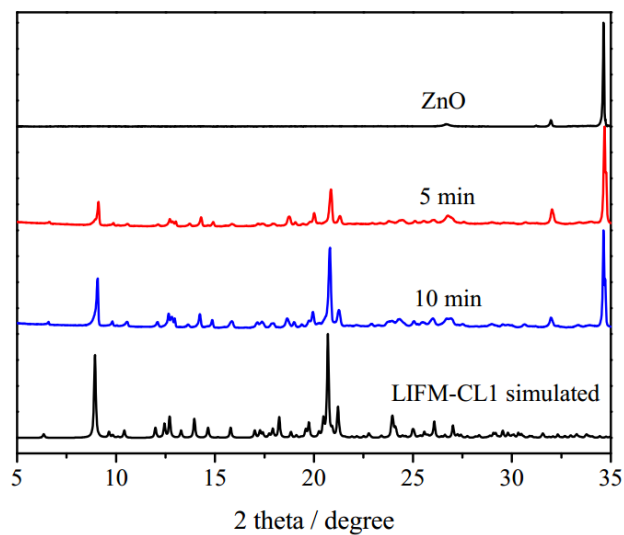

**Supplementary Figure 10** | PXRD patterns of the *in-situ* grown LIFM-CL1-H<sub>2</sub>O film at different times on the plated ZnO-precursor film. The peak of 26.4° is assigned to the FTO, and peaks at 32.1° and 34.8° are assigned to ZnO.

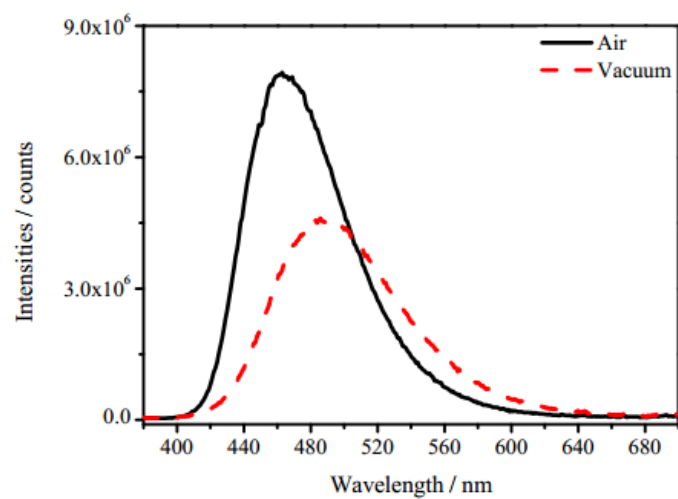

**Supplementary Figure 11** | Emission spectra of the LIFM-CL1-H<sub>2</sub>O-ZnO hybrid film in air and vacuum (under 365 nm UV, 25°C)

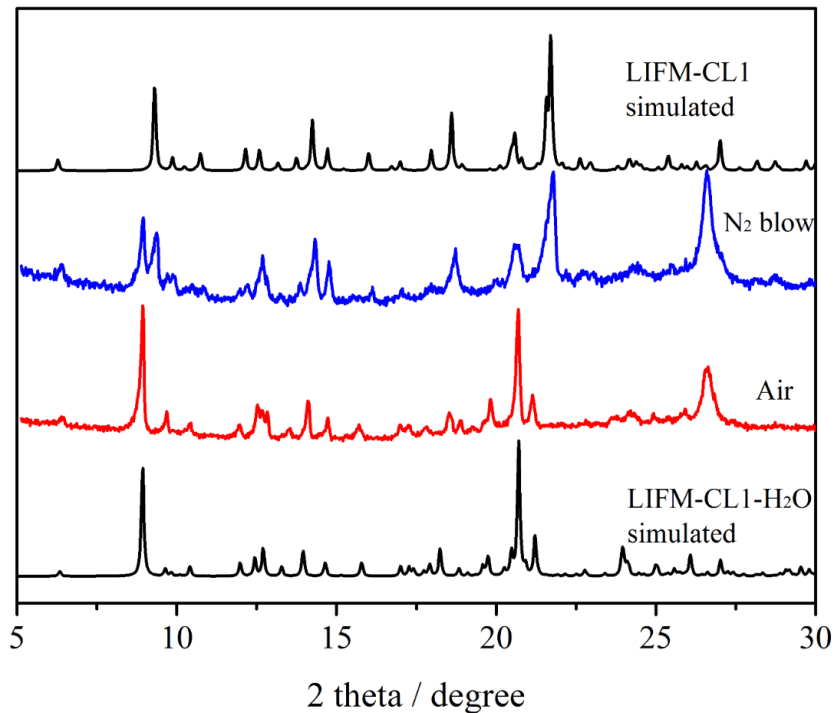

**Supplementary Figure 12** | The corresponding XRD patterns of LIFM-CL1-H<sub>2</sub>O-ZnO hybrid film under N<sub>2</sub> blowing. A polyethylene tubule orifice was set on the film for N<sub>2</sub> blowing and the XRD pattern was collected simultaneously (10° min<sup>-1</sup>). The peak of 26.4° was assigned to the FTO. As the nozzle we used for N<sub>2</sub> flow is very thin, so not the entire surface of LIFM-CL1-H<sub>2</sub>O-ZnO hybrid film could be blown and led to structural transformation. Therefore the part of the film not blown by N<sub>2</sub> flow would keep the LIFM-CL1-H<sub>2</sub>O phase, while this part was also exposed to X-ray beam and the PXRD pattern was collected together. And finally the PXRD pattern after N<sub>2</sub> blowing showed a mixture of the two forms.

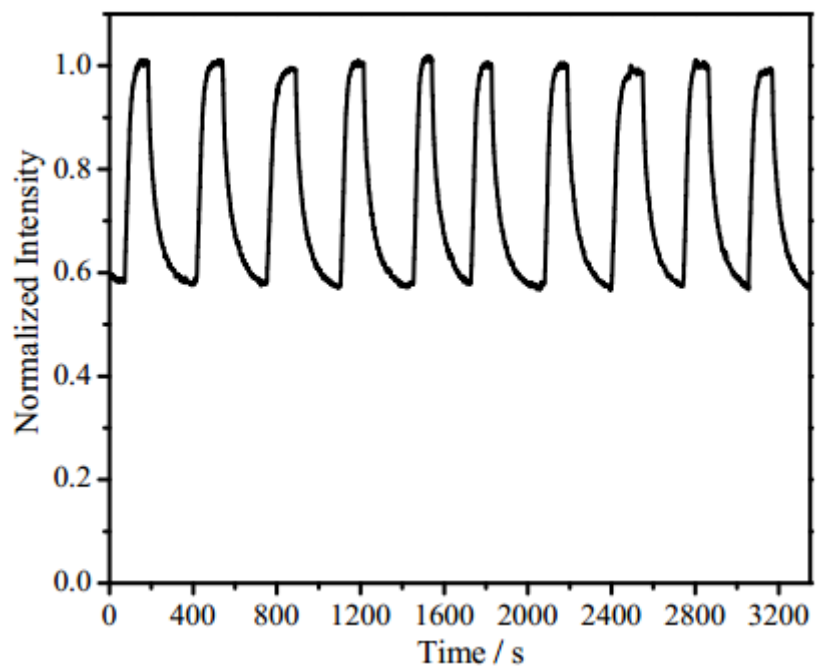

**Supplementary Figure 13** | Time-dependent photoluminescence intensity switch (excited at 365 nm and detected at 463 nm) of the LIFM-CL1-H<sub>2</sub>O-ZnO hybrid film, which was cycled between vacuum and 1 bar air (RH = 45% on the testing day) at 25 °C.

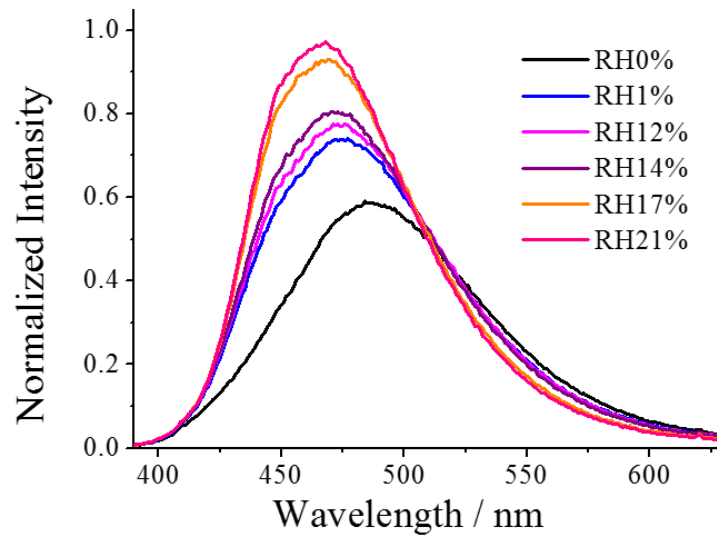

**Supplementary Figure 14** | The comparison of emission spectra of dehydrated LIFM-CL1 film in N<sub>2</sub> atmosphere with different humidities generated by purging N<sub>2</sub> through H<sub>2</sub>SO<sub>4</sub> containing different content of water and *in-situ* monitored by hygrometer.

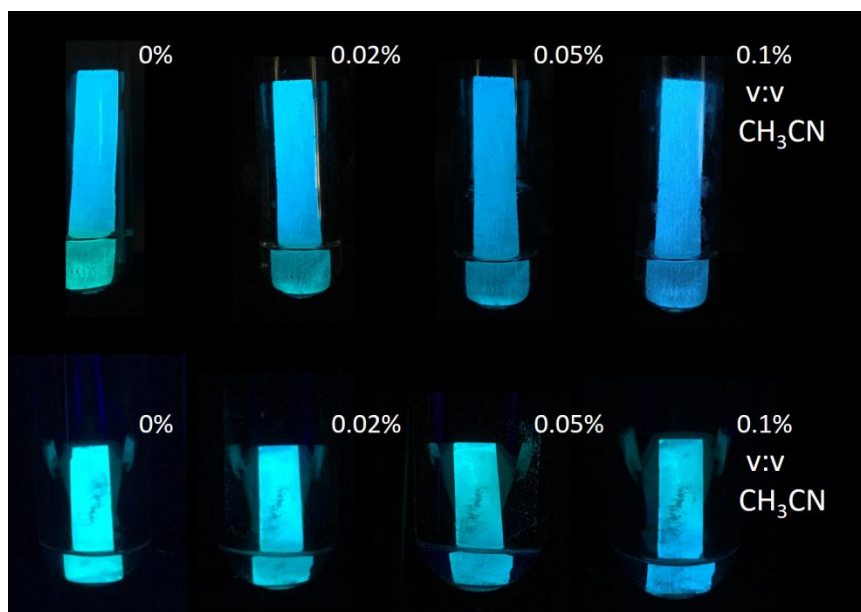

**Supplementary Figure 15** | Illustration of the application of Zn-MOFs films as PL sensors detection of traces of water in organic solvents (excited at 365 nm). Photographs showing PL color change by immersing hydrated LIFM-CL1-H<sub>2</sub>O-ZnO film or dehydrated LIFM-CL1-ZnO film partly into MeCN solutions containing different amounts of water (0, 0.02, 0.05, 0.1% v/v).



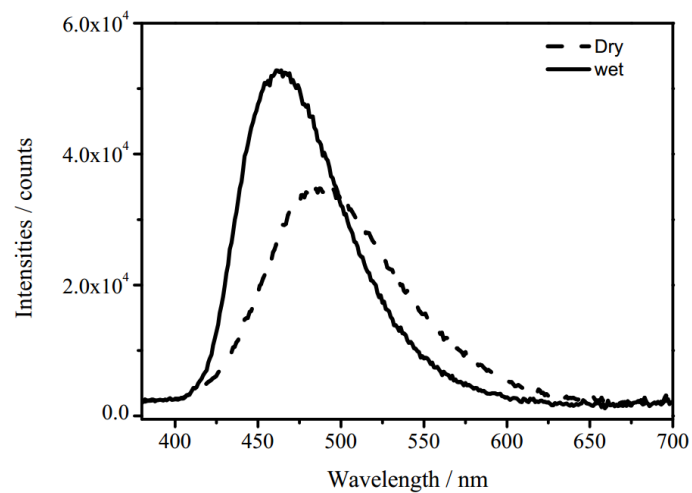

**Supplementary Figure 16** | Emission spectra of the *in-situ* grown LIFM-CL1-H<sub>2</sub>O-ZnO film in dry THF (dash) and wet THF (solid) with the water concentration of 0.05% , v/v (under 365 nm UV, 25°C).

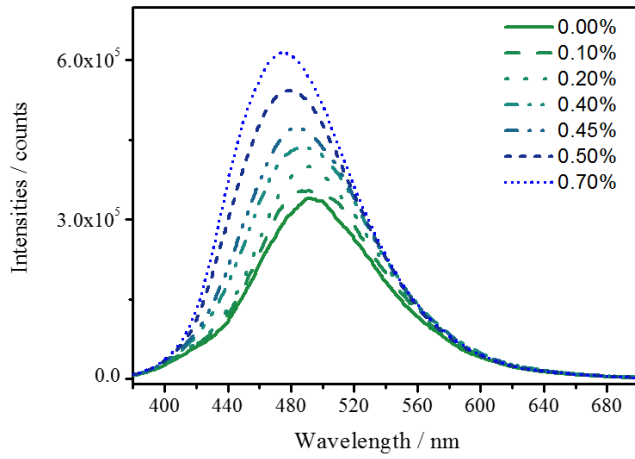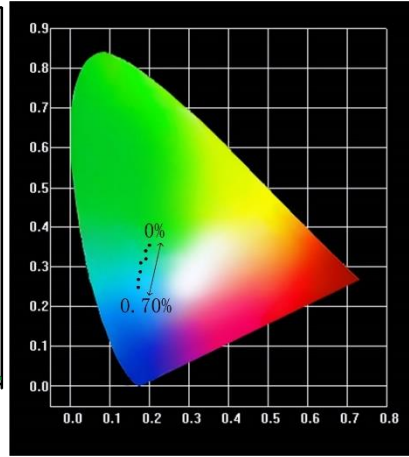

**a**

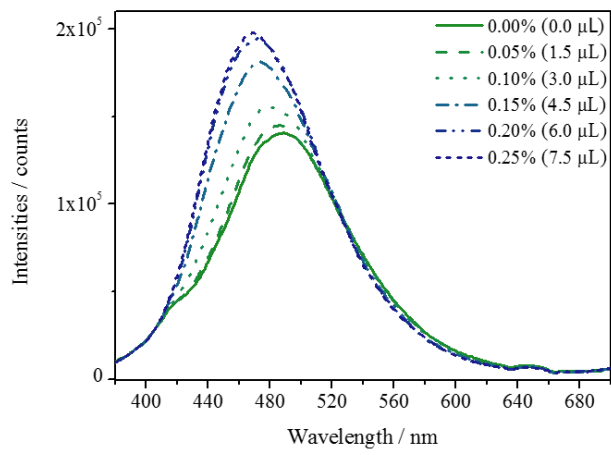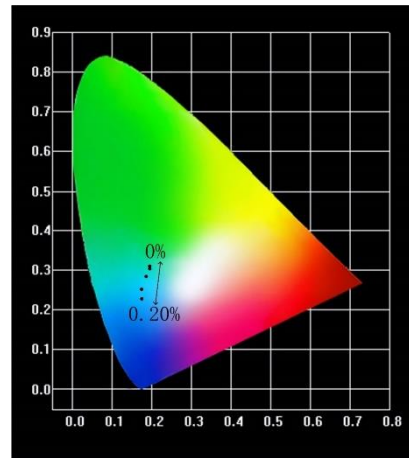

**b**

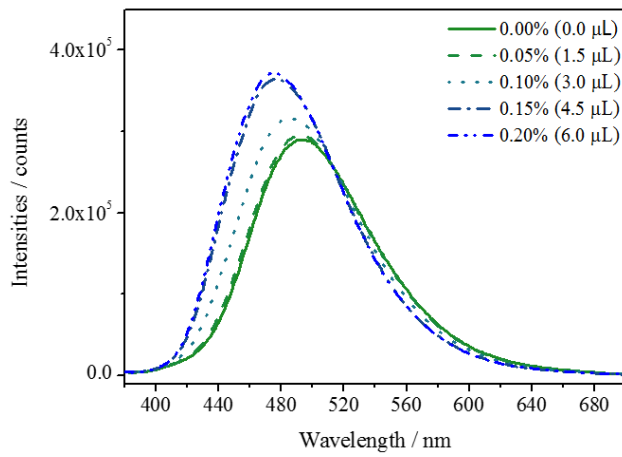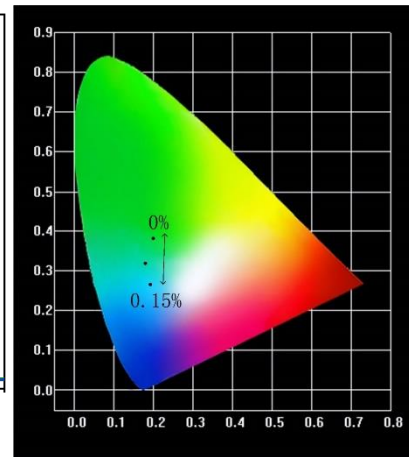

**c**

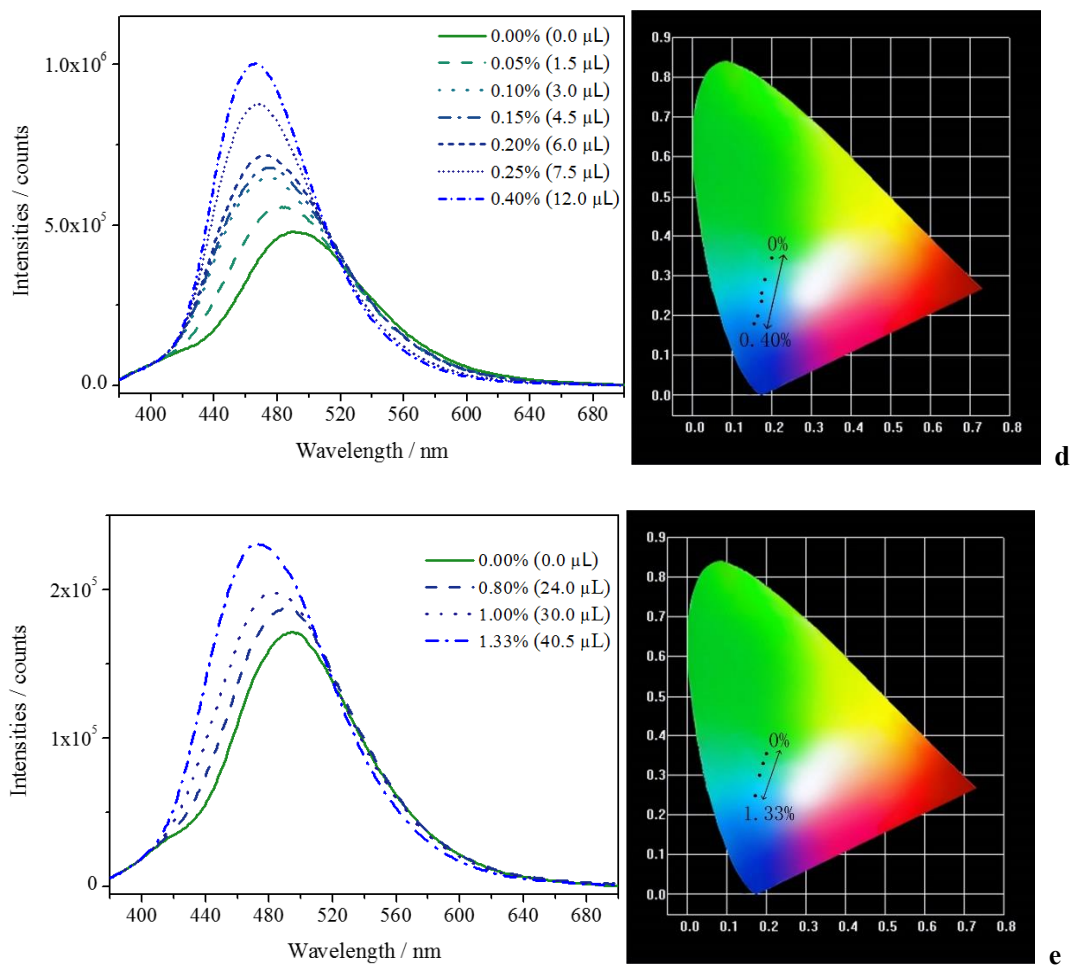

**Supplementary Figure 17** | Changes in the emission spectra of a stirred suspension of dehydrated LIFM–CL1 microcrystals in dry organic solvents upon addition of aliquots of water (%v:v), and corresponding CIE coordinates of emission color. **(a)** ethanol (EtOH); **(b)** acetone; **(c)** acetonitrile ( $\text{CH}_3\text{CN}$ ); **(d)** tetrahydrofuran (THF); **(e)** N,N-dimethylformamide (DMF). The excitation wavelength is 365 nm.

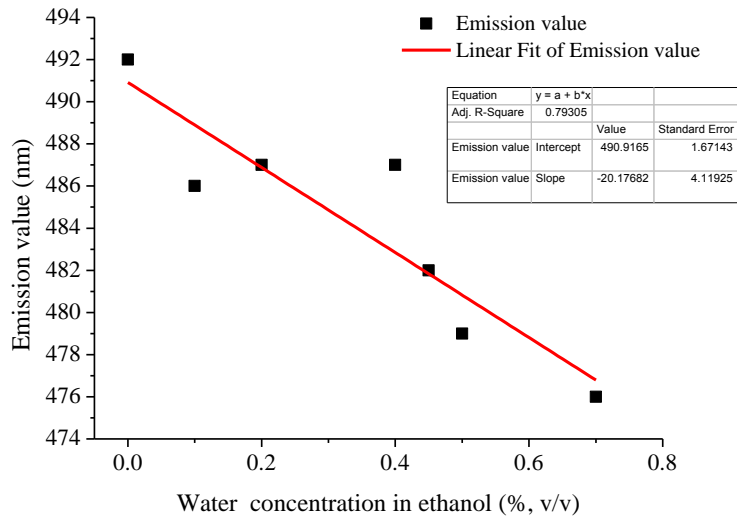

**a**

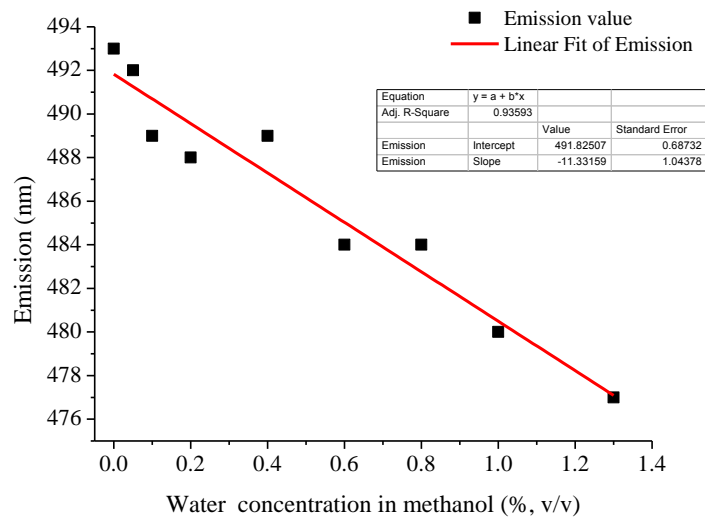

**b**

**Supplementary Figure 18** | Linear relationship between water concentration vs. emitting wavelength of LIFM-CL1-H<sub>2</sub>O powder sample suspended in EtOH (a) and MeOH (b).

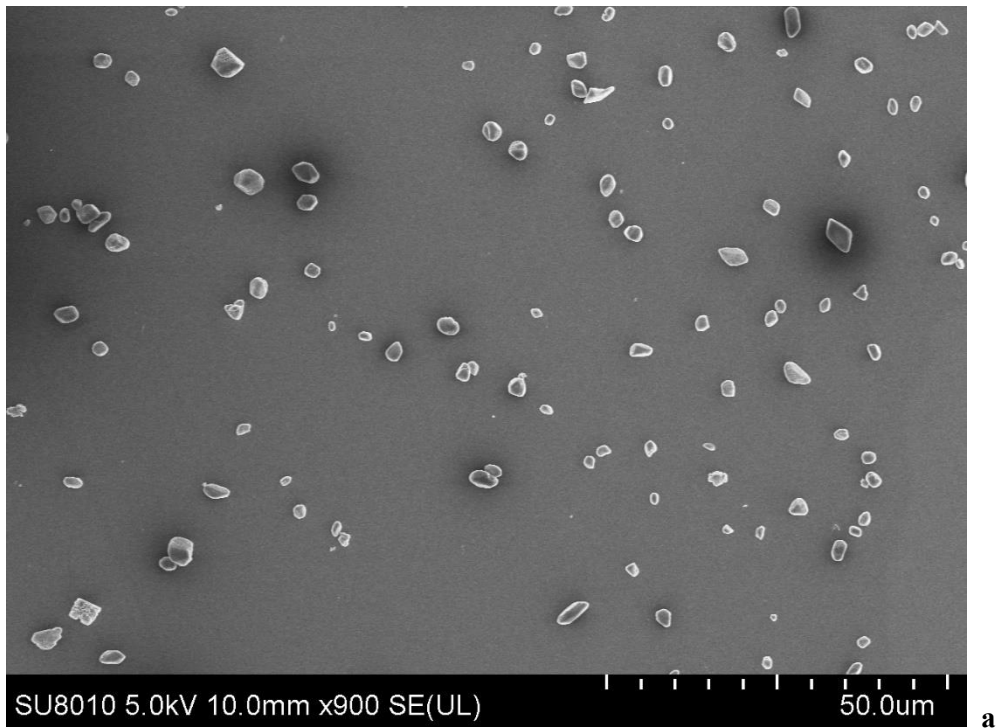

a

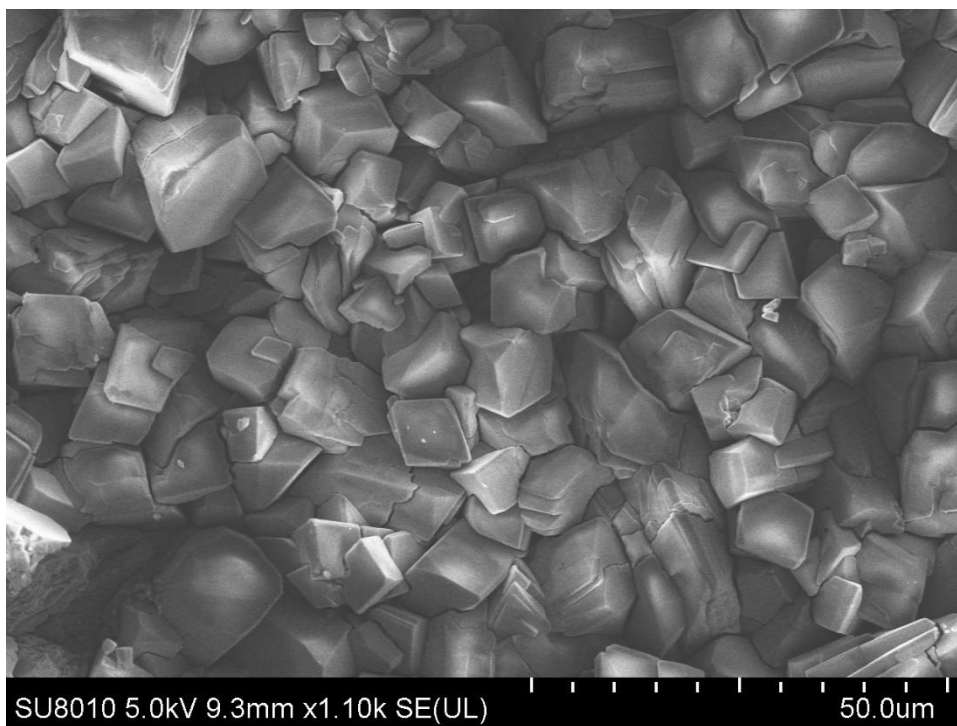

b

**Supplementary Figure 19** | SEM images of LIFM-CL1-H<sub>2</sub>O (a) microcrystallines synthesized by stirring hydrothermal method and (b) synthesized by *in-situ* growing method onto the ZnO-nanorod film.

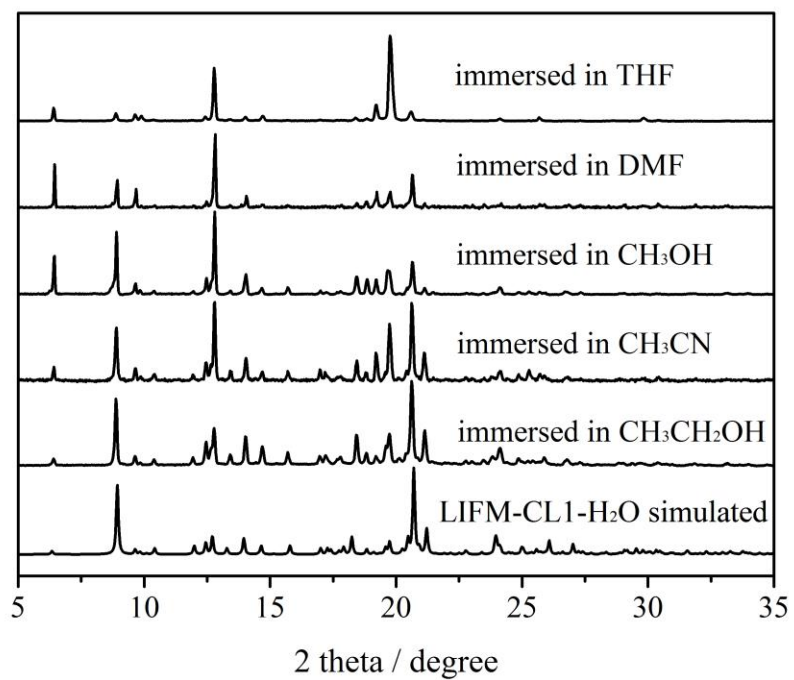

**Supplementary Figure 20** | PXRD patterns of LIFM-CL1-H<sub>2</sub>O powder (ground sample from crystals) immersed in organic solvents for two hours.

**Supplementary Table 1** | Crystallographic data and structure refinement for LIFM–CL1 and LIFM–CL1-H<sub>2</sub>O (the single-crystal X-ray diffraction data are collected on the same crystal before and after N<sub>2</sub> blow at 297 K, and at 358 K).

| Cell parameters             | Crystal<br>LIFM-CL1-H <sub>2</sub> O                                                                                                 | Crystal<br>LIFM-CL1-H <sub>2</sub> O                                                                                                 | Crystal LIFM-CL1                                                                                                                     | Crystal LIFM-CL1                                                                                                                     |
|-----------------------------|--------------------------------------------------------------------------------------------------------------------------------------|--------------------------------------------------------------------------------------------------------------------------------------|--------------------------------------------------------------------------------------------------------------------------------------|--------------------------------------------------------------------------------------------------------------------------------------|
| Formula                     | ZnC <sub>32</sub> H <sub>24</sub> F <sub>3</sub> N <sub>3</sub> O <sub>7</sub>                                                       | ZnC <sub>32</sub> H <sub>24</sub> F <sub>3</sub> N <sub>3</sub> O <sub>7</sub>                                                       | ZnC <sub>32</sub> H <sub>22</sub> F <sub>3</sub> N <sub>3</sub> O <sub>6</sub>                                                       | ZnC <sub>32</sub> H <sub>22</sub> F <sub>3</sub> N <sub>3</sub> O <sub>6</sub>                                                       |
| Temperature (K)             | 150                                                                                                                                  | 297                                                                                                                                  | 297, N <sub>2</sub> blow                                                                                                             | 358                                                                                                                                  |
| Wavelength (Å)              | Cu K $\alpha$ , 1.5418                                                                                                               | Cu K $\alpha$ , 1.5418                                                                                                               | Cu K $\alpha$ , 1.5418                                                                                                               | Cu K $\alpha$ , 1.5418                                                                                                               |
| Crystal system              | Monoclinic                                                                                                                           | Monoclinic                                                                                                                           | Monoclinic                                                                                                                           | Monoclinic                                                                                                                           |
| Space group                 | <i>P2<sub>1</sub>/c</i>                                                                                                              | <i>P2<sub>1</sub>/c</i>                                                                                                              | <i>P2<sub>1</sub>/c</i>                                                                                                              | <i>P2<sub>1</sub>/c</i>                                                                                                              |
| Unit cell dimensions        | a = 14.9914(2) Å<br>b = 12.0248(1) Å<br>c = 18.1645(3) Å<br>$\alpha = 90^\circ$<br>$\beta = 111.468(2)^\circ$<br>$\gamma = 90^\circ$ | a = 14.7944(2) Å<br>b = 12.2949(2) Å<br>c = 18.1623(3) Å<br>$\alpha = 90^\circ$<br>$\beta = 110.117(2)^\circ$<br>$\gamma = 90^\circ$ | a = 14.7953(4) Å<br>b = 11.6024(3) Å<br>c = 17.3581(5) Å<br>$\alpha = 90^\circ$<br>$\beta = 108.351(3)^\circ$<br>$\gamma = 90^\circ$ | a = 14.8070(4) Å<br>b = 11.7383(4) Å<br>c = 17.3054(6) Å<br>$\alpha = 90^\circ$<br>$\beta = 108.442(3)^\circ$<br>$\gamma = 90^\circ$ |
| Volume (Å <sup>3</sup> )    | 3047.31(8)                                                                                                                           | 3102.09(9)                                                                                                                           | 2828.18                                                                                                                              | 2853.37(17)                                                                                                                          |
| Z                           | 4                                                                                                                                    | 4                                                                                                                                    | 4                                                                                                                                    | 4                                                                                                                                    |
| Dcalc (g·cm <sup>-3</sup> ) | 1.493                                                                                                                                | 1.467                                                                                                                                | 1.566                                                                                                                                | 1.552                                                                                                                                |
| Mu (mm <sup>-1</sup> )      | 0.877                                                                                                                                | 0.862                                                                                                                                | 0.941                                                                                                                                | 0.932                                                                                                                                |
| F(000)                      | 1400                                                                                                                                 | 1400                                                                                                                                 | 1360.0                                                                                                                               | 1360.0                                                                                                                               |
| GOF                         | 1.079                                                                                                                                | 1.040                                                                                                                                | 1.038                                                                                                                                | 1.062                                                                                                                                |
| R1(all)                     | 0.0520(4910)                                                                                                                         | 0.0732(5218)                                                                                                                         | 0.0555(4624)                                                                                                                         | 0.0619(4773)                                                                                                                         |
| wR2 [I>2 $\sigma$ (I)]      | 0.1616(5457)                                                                                                                         | 0.1980(6075)                                                                                                                         | 0.1709(5534)                                                                                                                         | 0.1861(5555)                                                                                                                         |

**Supplementary Table 2** | Photophysical properties of complex LIFM-CL1 and LIFM-CL1-H<sub>2</sub>O.

| Form                      | Em, $\lambda_{\text{nm}}$ | PLQY/% | Lifetime, $\tau_{\text{ns}}$ |
|---------------------------|---------------------------|--------|------------------------------|
| LIFM-CL1                  | 463                       | 22     | 5.21                         |
| LIFM-CL1-H <sub>2</sub> O | 493                       | 15     | 5.52                         |

**Supplementary Table 3** | Comparison of key parameters of reported fast luminescence water sensors.

| Luminophor                                                                          | Phase as sensing material                                        | Chemical formula                     | Emission position shift / nm | Intensity change | Water content                                                  | Activation/ Recovery                                   | Interference molecule                    | Responding time      | Ref |
|-------------------------------------------------------------------------------------|------------------------------------------------------------------|--------------------------------------|------------------------------|------------------|----------------------------------------------------------------|--------------------------------------------------------|------------------------------------------|----------------------|-----|
| 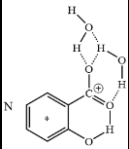   | Mixture: doped poly(vinyl-alcohol) (PVA) film                    | $C_7H_9NO_5^+$                       | -- <sup>a</sup>              | Decreased        | RH from 5% to 85%;<br>Concentration 0% -60% v/v in 1,4-dioxane | < 1 minute,<br>As PVA desorbs H <sub>2</sub> O quickly | -- <sup>b</sup>                          | 2 minutes            | 1   |
|    | Mixture: doped poly(2-hydroxyethyl methacrylate) (PHEMA) polymer | $C_{15}H_{11}O_3^+$                  | -- <sup>a</sup>              | Decreased        | RH from 20% to 100%                                            | Dried overnight in a desiccator containing silica gel  | NH <sub>3</sub>                          | -- <sup>b</sup>      | 2   |
|   | Mixture: doped poly(2-hydroxyethyl methacrylate) (PHEMA) polymer | $C_{16}H_{13}O_2^+$                  | -- <sup>a</sup>              | Decreased        | RH of 80%                                                      | Dried overnight in a desiccator containing silica gel  | NH <sub>3</sub>                          | 1 hour               |     |
|  | 2D net                                                           | $C_{24.50}H_{20}CuIN_{4.50}O_{1.25}$ | 607 to 613                   | Increased        | RH of 33%, 43%, 57%, and 75.8%.                                | guest-exchange                                         | Depending on guest species encapsulation | 1.5 to 4 hours       | 3   |
| Eu <sup>3+</sup> or Tb <sup>3+</sup> as counter cation in a 3D porous framework     |                                                                  | $C_{11}H_{11}O_9Ln$                  | No shift                     | Increased        | RH of 5%, 30%, 48%, 75.8% and 85%.                             | heating at 200 °C for 2 h                              | Not mentioned                            | 1 to 24 hours        | 4   |
|  | 3-connected 2D net                                               | $C_{72}H_{38}N_{14}O_{36}Cu_9Mn_2$   | 586 to 544                   | Increased        | Concentration 0-33 wt% in toluene.                             | vacuum and heating at 373 K for 16 h                   | MeOH                                     | More than 60 minutes | 5   |
|  | Connected 3D irl net                                             | $C_8H_8O_8Mg$                        | 455 to 530                   | Increased        | Concentration 0.05 - 5% v/v in organic solvents.               | MeOH-exchange plus gentle heating at 50 °C             | MeOH, EtOH, CH <sub>3</sub> CN, DMAc     | 2 minutes            | 6   |



|                                                                                   |                                                                      |                         |            |           |                                                                                       |                                     |                          |                                                |           |
|-----------------------------------------------------------------------------------|----------------------------------------------------------------------|-------------------------|------------|-----------|---------------------------------------------------------------------------------------|-------------------------------------|--------------------------|------------------------------------------------|-----------|
| 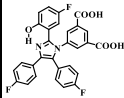 | 3D structure connected by 1D chains via H-bonding and $\pi$ stacking | $C_{32}H_{22}F_3N_3O_6$ | 493 to 463 | Increased | RH < 1%;<br>Concentration < 0.05% v/v in organic solvents;<br>Quantitative 0-1.3% v:v | dry gas blowing or heating at 70 °C | Only responsive to water | For gas: ~2 seconds.<br>For liquid: instantly. | This work |
|-----------------------------------------------------------------------------------|----------------------------------------------------------------------|-------------------------|------------|-----------|---------------------------------------------------------------------------------------|-------------------------------------|--------------------------|------------------------------------------------|-----------|

<sup>a</sup> No emission position shift. <sup>b</sup> Not mentioned.

**Supplementary Table 4** | Examination of water content of the used CH<sub>3</sub>OH solvents by Karl Fischer Coulometric Titrimetry.

|                   |                                                |         |             |             |             |
|-------------------|------------------------------------------------|---------|-------------|-------------|-------------|
| Theoretical value | V (H <sub>2</sub> O) / 3 mL CH <sub>3</sub> OH | 0       | 1.5 $\mu$ L | 3.0 $\mu$ L | 6.0 $\mu$ L |
|                   | V / V                                          | 0%      | 0.05%       | 0.10%       | 0.20%       |
| Measured value    | Detected/ ppm (mg/kg)                          | 316.4   | 957.3       | 1539.3      | 2866.1      |
|                   | V / V                                          | 0.0251% | 0.0758%     | 0.1219 %    | 0.2271 %    |

**Supplementary Table 5** | Confirmation of water content of CH<sub>3</sub>OH solvents before and after being soaked with hydrated LIFM-CL1-H<sub>2</sub>O and dehydrated LIFM-CL1 by Karl Fischer Coulometric Titrimetry.

|                     |        |                      |          |            |
|---------------------|--------|----------------------|----------|------------|
| Mass of sample (mg) |        |                      | hydrated | dehydrated |
|                     |        |                      | 3.1      | 2.2        |
| Water content (v/v) | before | Measured/ppm (mg/kg) | 316.4    | 2866.1     |
|                     |        | V / V                | 0.0251%  | 0.2271 %   |
|                     | after  | Measured/ppm (mg/kg) | 412.1    | 2718.5     |
|                     |        | V / V                | 0.0326%  | 0.2154%    |

## Supplementary Methods

### Synthesis of H<sub>2</sub>hpi2cf

A mixture of 5-aminoisophthalic acid (5 mmol, 0.905 g) and 5-fluoro-2-hydroxybenzaldehyde (3 mmol, 0.420 g), acetic acid (20 mL) were stirred at 110°C for two hours under the protection of nitrogen, continued with adding 4, 4'-difluorobenzil (3 mmol, 0.738 g), ammonium acetate (50 mmol, 3.85 g), then the mixture were kept heated and stirred for another 10 hours. After cooling, the white solid was filtered out, washed by water for several times and then dried at 100 °C in air. Recrystallization in the ethyl acetate affords colorless crystal product (530 mg, yield = 67%).<sup>7</sup> Compound H<sub>2</sub>hpi2cf was analyzed as H<sub>2</sub>hpi2cf·DMF·EtOH. Anal calcd. for C<sub>34</sub>H<sub>30</sub>F<sub>3</sub>N<sub>3</sub>O<sub>7</sub> (%): C, 62.86; H, 4.65; N, 6.47; found: C, 62.68; H, 4.563; N, 6.72. IR (KBr pellet, cm<sup>-1</sup>):  $\nu$  = 3471 (-O-H), 3075 (Ar-H), 1705 (-C=O), 1630 (-C=N-), 1510 (C=C), 670, 780 (C-H). <sup>1</sup>H NMR (400 MHz, DMSO-*d*<sub>6</sub>,  $\delta$ ): 8.34 (t, J = 1.4 Hz, 1H, carboxyl-H), 7.95 (s, 1H, 1-Ar-H), 7.90 (d, J = 1.5 Hz, 2H, 1-Ar-H), 7.53 – 7.42 (m, 2H, Ar-H), 7.36 – 7.27 (m, 2H, Ar-H), 7.17 (dt, J = 16.1, 8.9 Hz, 4H, Ar-H), 7.06 (td, J = 8.6, 3.2 Hz, 1H, 2-Ar-H), 6.93 (dd, J = 9.4, 3.1 Hz, 1H, 2-Ar-H), 6.77 (dd, J = 9.0, 4.9 Hz, 1H, 2-Ar-H).

## Supplementary References

- (1) Mishra, H., Misra, V., Mehata, M. S., Pant, T. C. & Tripathi, H. B. Fluorescence studies of salicylic acid doped poly(vinyl alcohol) film as a water/humidity sensor. *J. Phys. Chem. A* **108**, 2346-2352 (2004).
- (2) Galindo, F. *et al.* Water/humidity and ammonia sensor, based on a polymer hydrogel matrix containing a fluorescent flavylum compound. *J. Mater. Chem.* **15**, 2840-2847 (2005).
- (3) Yu, Y. *et al.* Cu(I)-MOF: naked-eye colorimetric sensor for humidity and formaldehyde in single-crystal-to-single-crystal fashion. *Chem. Commun.* **50**, 1444-1446 (2014).
- (4) Yu, Y., Ma, J.-P. & Dong, Y.-B. Luminescent humidity sensors based on porous Ln<sup>3+</sup>-MOFs. *CrystEngComm* **14**, 7157-7160 (2012).
- (5) Ferrando-Soria, J. *et al.* Highly selective chemical sensing in a luminescent nanoporous magnet. *Adv. Mater.* **24**, 5625-5629 (2012).
- (6) Douvali, A. *et al.* Turn-on luminescence sensing and real-time detection of traces of water in organic solvents by a flexible metal-organic framework. *Angew. Chem. Int. Ed.* **54**, 1651-1656 (2015).
- (7) Chen, L. *et al.* A naked eye colorimetric sensor for alcohol vapor discrimination and amplified spontaneous emission (ASE) from a highly fluorescent excited-state intramolecular proton transfer (ESIPT) molecule. *J. Mater. Chem. C* **4**, 6962-6966 (2016).
